# Supplementary material
Source: publisher site journal article supplement (https://www.spandidos-publications.com/8395/downloadSupplementary)

Figure S1. Overexpression of 5-LOX upregulated the production of leukotrienes in RKO cells. The relative expression of (A) LTB<sub>4</sub> and (B) LTE<sub>4</sub> in the supernatants of RKO cells infected with OE-Vector and OE-5-LOX were detected by ELISA. Values are expressed as mean  $\pm$  standard error of the mean (n=3). \*\*P<0.01, \*\*\*P<0.001. LTB<sub>4</sub>, leukotriene B<sub>4</sub>; LTE<sub>4</sub>, leukotriene E<sub>4</sub>; 5-LOX, 5-lipoxygenase; OE-Vector, cells infected with empty vector control lentivirus; OE-5-LOX, cells infected with 5-LOX recombinant lentivirus.

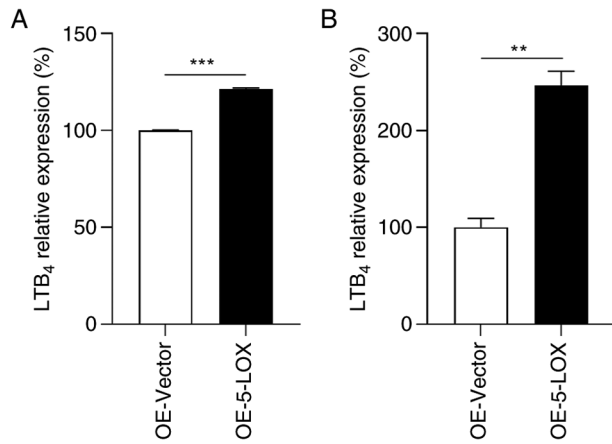

Figure S2. Expression of VEGF protein in HUVECs. Relative protein expression of VEGF in HUVECs incubated with collected media from (A) siRNA-silenced HCT116 cells (si-NC and si-5-LOX-#2 groups) and (B) lentivirus-overexpressed RKO cells (OE-Vector and OE-5-LOX groups) for 24 h was determined by western blot analysis. Values are expressed as mean  $\pm$  standard error of the mean (n=3). \*\*P<0.01, \*\*\*P<0.001. OE-Vector, cells infected with empty vector control lentivirus; OE-5-LOX, cells infected with 5-LOX recombinant lentivirus; siRNA, small interfering RNA; NC, negative control; 5-LOX, 5-lipoxygenase; HUVEC, human umbilical vein endothelial cell.

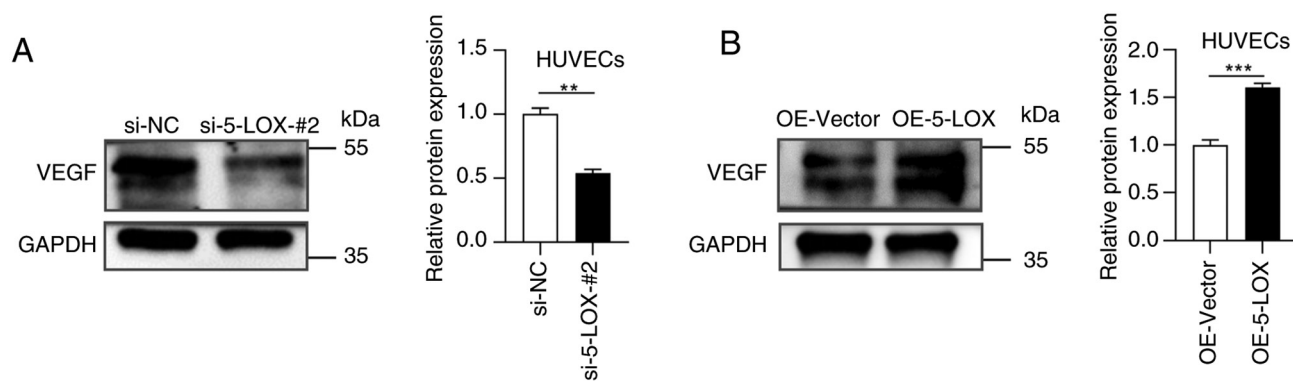

Supplement: Supplementary file 1 [file downloadSupplementary]
